# Supplementary material for: Developmental self-reactivity determines pathogenic Tc17 differentiation potential of naive CD8+ T cells in murine models of inflammation
Source: PubMed Central journal article supplement (PMC10994929; doi:10.1038/s41467-024-47144-4), 2024-04-04
Supplement: 41467_2024_47144_MOESM1_ESM.pdf [file 41467_2024_47144_MOESM1_ESM.pdf]

## **Supplementary Information**

### **Developmental self-reactivity determines pathogenic Tc17 differentiation potential of naive CD8<sup>+</sup> T cells under inflammatory conditions**

Gil-Woo Lee, Young Ju Kim, Sung-Woo Lee, Hee-Ok Kim, Daeun Kim, Jiyoung Kim, You-Me Kim, Keunsoo Kang, Joon Haeng Rhee, Ik Joo Chung, Woo Kyun Bae, In-Jae Oh, Deok Hwan Yang, and Jae-Ho Cho

#### **Supplementary information includes:**

Supplementary Figures 1–7

Supplementary Figure legends 1–7

Supplementary Tables 1 and 2

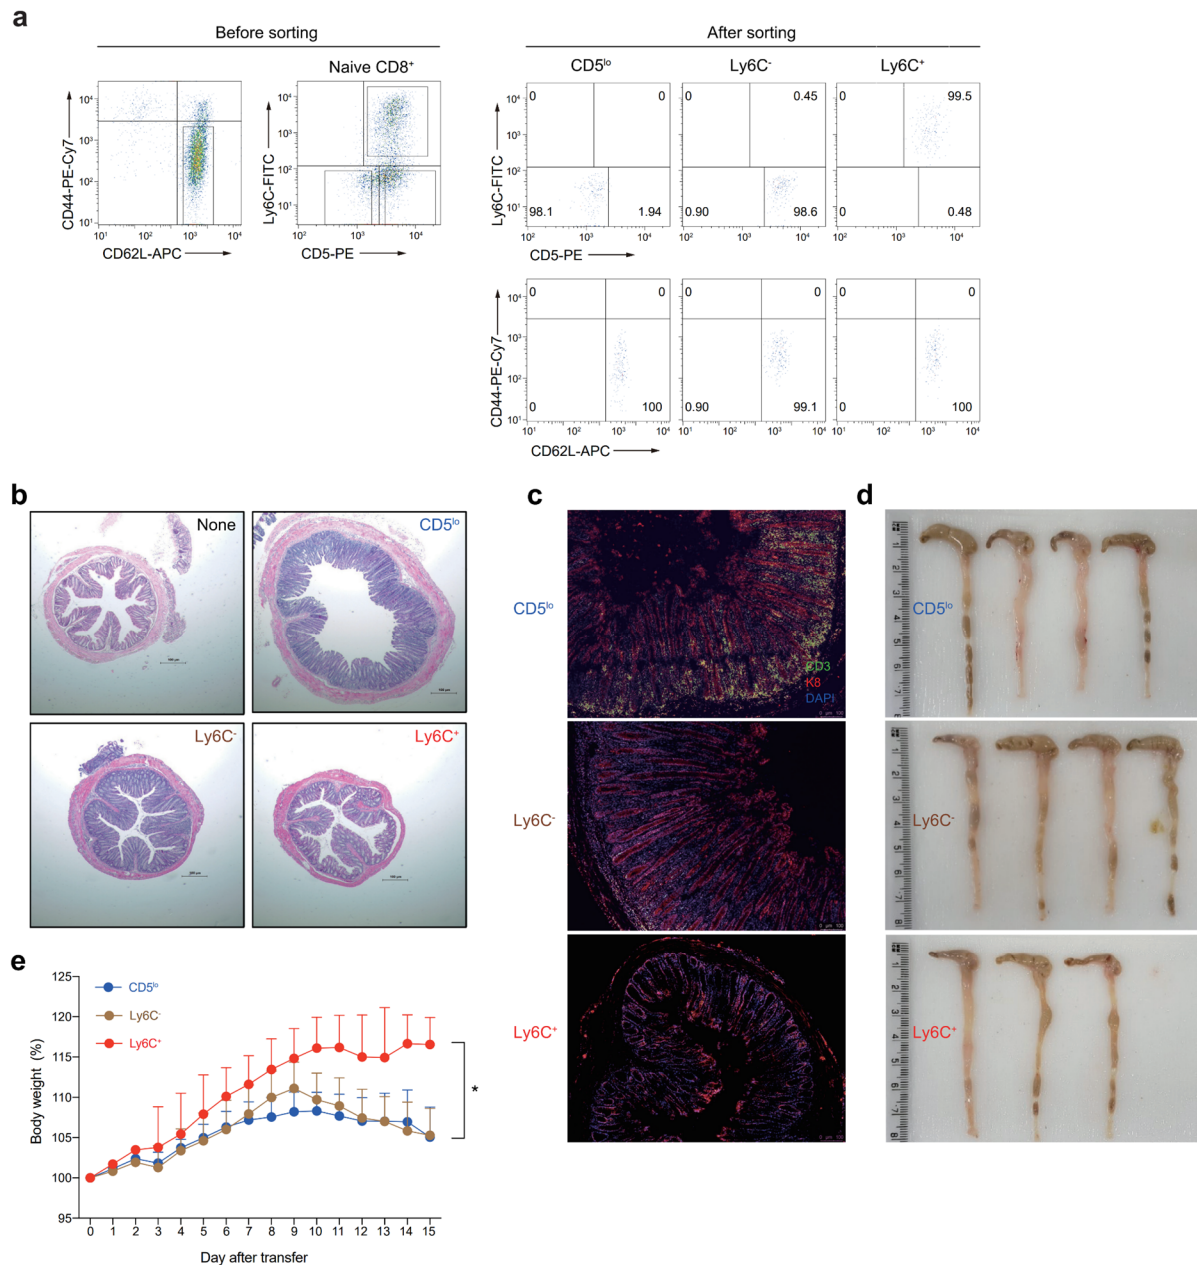

## Supplementary Fig. 1

### Pathologic symptoms induced by different CD8<sup>+</sup> T<sub>N</sub> subsets in *Rag1*<sup>-/-</sup> mice.

**a**, Sorting purity of naive CD8<sup>+</sup> T cells subsets. **b**, Representative H & E staining images (magnification, 40×). **c**, Representative immunofluorescence images (magnification, 200×). **d**, Representative photo images for day 14 LI. **e**, Body weight changes of *Rag1*<sup>-/-</sup> recipients after adoptive transfer with CD8<sup>+</sup> T<sub>N</sub> subsets (n=6). Data is representative of three independent

experiments and presented as the mean  $\pm$  SD (**d**). Statistical significance by Mann-Whitney test. \*,  $P < 0.05$ ; \*\*,  $P < 0.01$ ; \*\*\*,  $P < 0.001$ ; \*\*\*\*,  $P < 0.0001$ . Source data and exact  $P$  value are provided as a Source Data file.

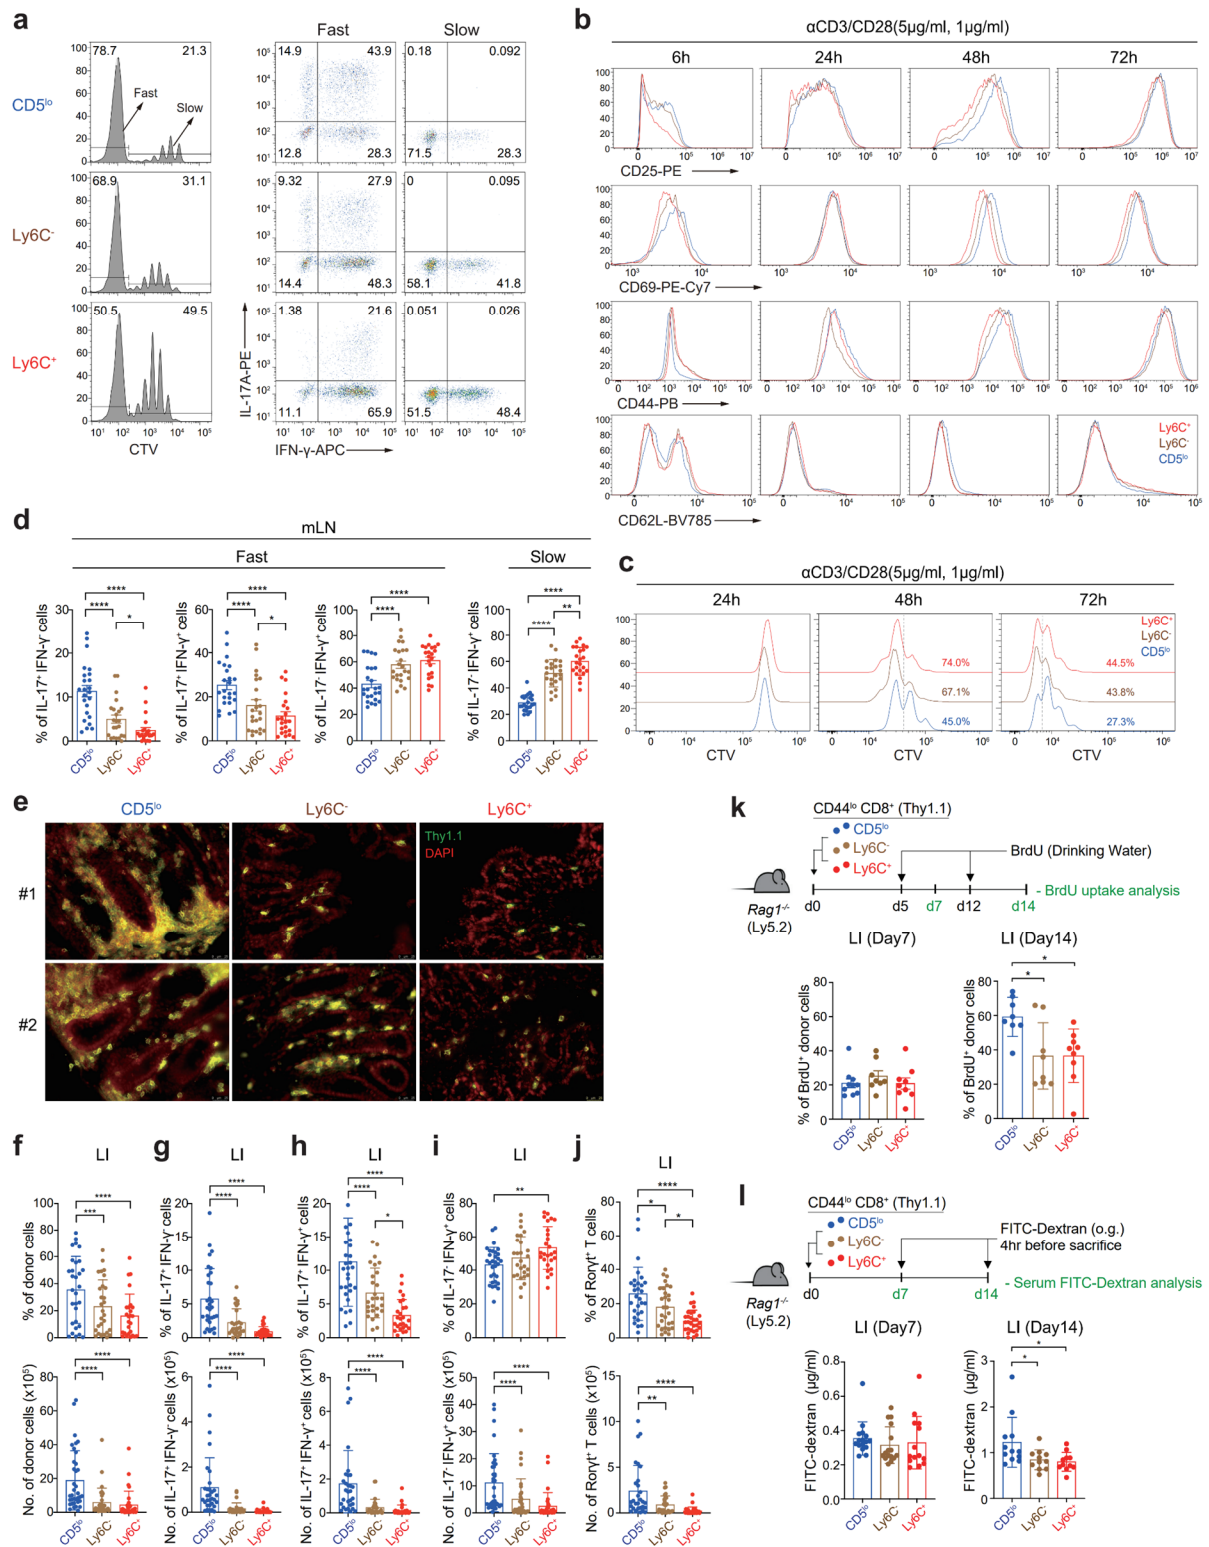

Supplementary Fig. 2

Proliferation, colonic infiltration, and IL-17/IFN- $\gamma$  production of adoptively transferred CD8<sup>+</sup> T<sub>N</sub> subsets in *Rag1*<sup>-/-</sup> mice.



**a**, CTV-labeled CD5<sup>lo</sup>, Ly6C<sup>-</sup>, and Ly6C<sup>+</sup> CD8<sup>+</sup> T<sub>N</sub> subsets were adoptively transferred into *Rag1*<sup>-/-</sup> recipients and the proliferation of donor cells were analyzed at day 7 by measuring CTV dilution. Representative histograms (left) and FACS plots (right) show CTV dilution and IL-17A/IFN- $\gamma$  production, respectively, for fast and slow proliferative donor cells. **b**, CD5<sup>lo</sup>, Ly6C<sup>-</sup>, and Ly6C<sup>+</sup> CD8<sup>+</sup> T<sub>N</sub> subsets were stimulated with plate-bound anti-CD3 and anti-CD28, and analyzed for expression patterns of various activation markers (CD25, CD69, CD44, and CD62L) at different time points. **c**, T<sub>N</sub> subsets were labeled with CTV and then cultured on plates coated with anti-CD3 and anti-CD28. Cell proliferation was analyzed by flow cytometry at 24, 48, and 72 h after TCR stimulation. **d**, Percentage of IL-17A<sup>+</sup>IFN- $\gamma$ <sup>-</sup>, IL-17A<sup>+</sup>IFN- $\gamma$ <sup>+</sup>, and IL-17A<sup>-</sup>IFN- $\gamma$ <sup>+</sup> cells for fast (left) and slow (right) proliferative donor subsets in day 7 mLN (CD5<sup>lo</sup> n=24, Ly6C<sup>-</sup> n=23 and Ly6C<sup>+</sup> n=22). **e–j**, Immunofluorescence images for Thy1.1<sup>+</sup> donor cells (**e**; scale bar, 25  $\mu$ m), the percentage and number of total donor (**f**, CD5<sup>lo</sup> n=30, Ly6C<sup>-</sup> n=28 and Ly6C<sup>+</sup> n=26), IL-17A<sup>+</sup>IFN- $\gamma$ <sup>-</sup> (**g**, CD5<sup>lo</sup> n=30, Ly6C<sup>-</sup> n=28 and Ly6C<sup>+</sup> n=26), IL-17A<sup>+</sup>IFN- $\gamma$ <sup>+</sup> (**h**, CD5<sup>lo</sup> n=30, Ly6C<sup>-</sup> n=28 and Ly6C<sup>+</sup> n=26) IL-17A<sup>-</sup>IFN- $\gamma$ <sup>+</sup> (**i**, CD5<sup>lo</sup> n=30, Ly6C<sup>-</sup> n=28 and Ly6C<sup>+</sup> n=26), and Rorgt<sup>+</sup> (**j**, n=29) cells from day 14 LI. **k**. Percentage of BrdU<sup>+</sup> cells in donor cells from LI (left; CD5<sup>lo</sup> n=10, Ly6C<sup>-</sup> n=8 and Ly6C<sup>+</sup> n=9, right; CD5<sup>lo</sup> n=8, Ly6C<sup>-</sup> n=8 and Ly6C<sup>+</sup> n=9). **l**. *In vivo* gut permeability assay from mice receiving individual CD8<sup>+</sup> T<sub>N</sub> subsets (left; CD5<sup>lo</sup> n=16, Ly6C<sup>-</sup> n=16 and Ly6C<sup>+</sup> n=14, right; CD5<sup>lo</sup> n=12, Ly6C<sup>-</sup> n=11 and Ly6C<sup>+</sup> n=11). Data are pooled from three (**d**), two independent (**k,l**), and four (**f–i,j**) independent experiments and presented as the mean  $\pm$  SEM (**d–j**). Statistical significance by two-way ANOVA Multiple comparisons. \*,  $P < 0.05$ ; \*\*,  $P < 0.01$ ; \*\*\*,  $P < 0.001$ ; \*\*\*\*,  $P < 0.0001$ . Source data and exact  $P$  value are provided as a Source Data file.

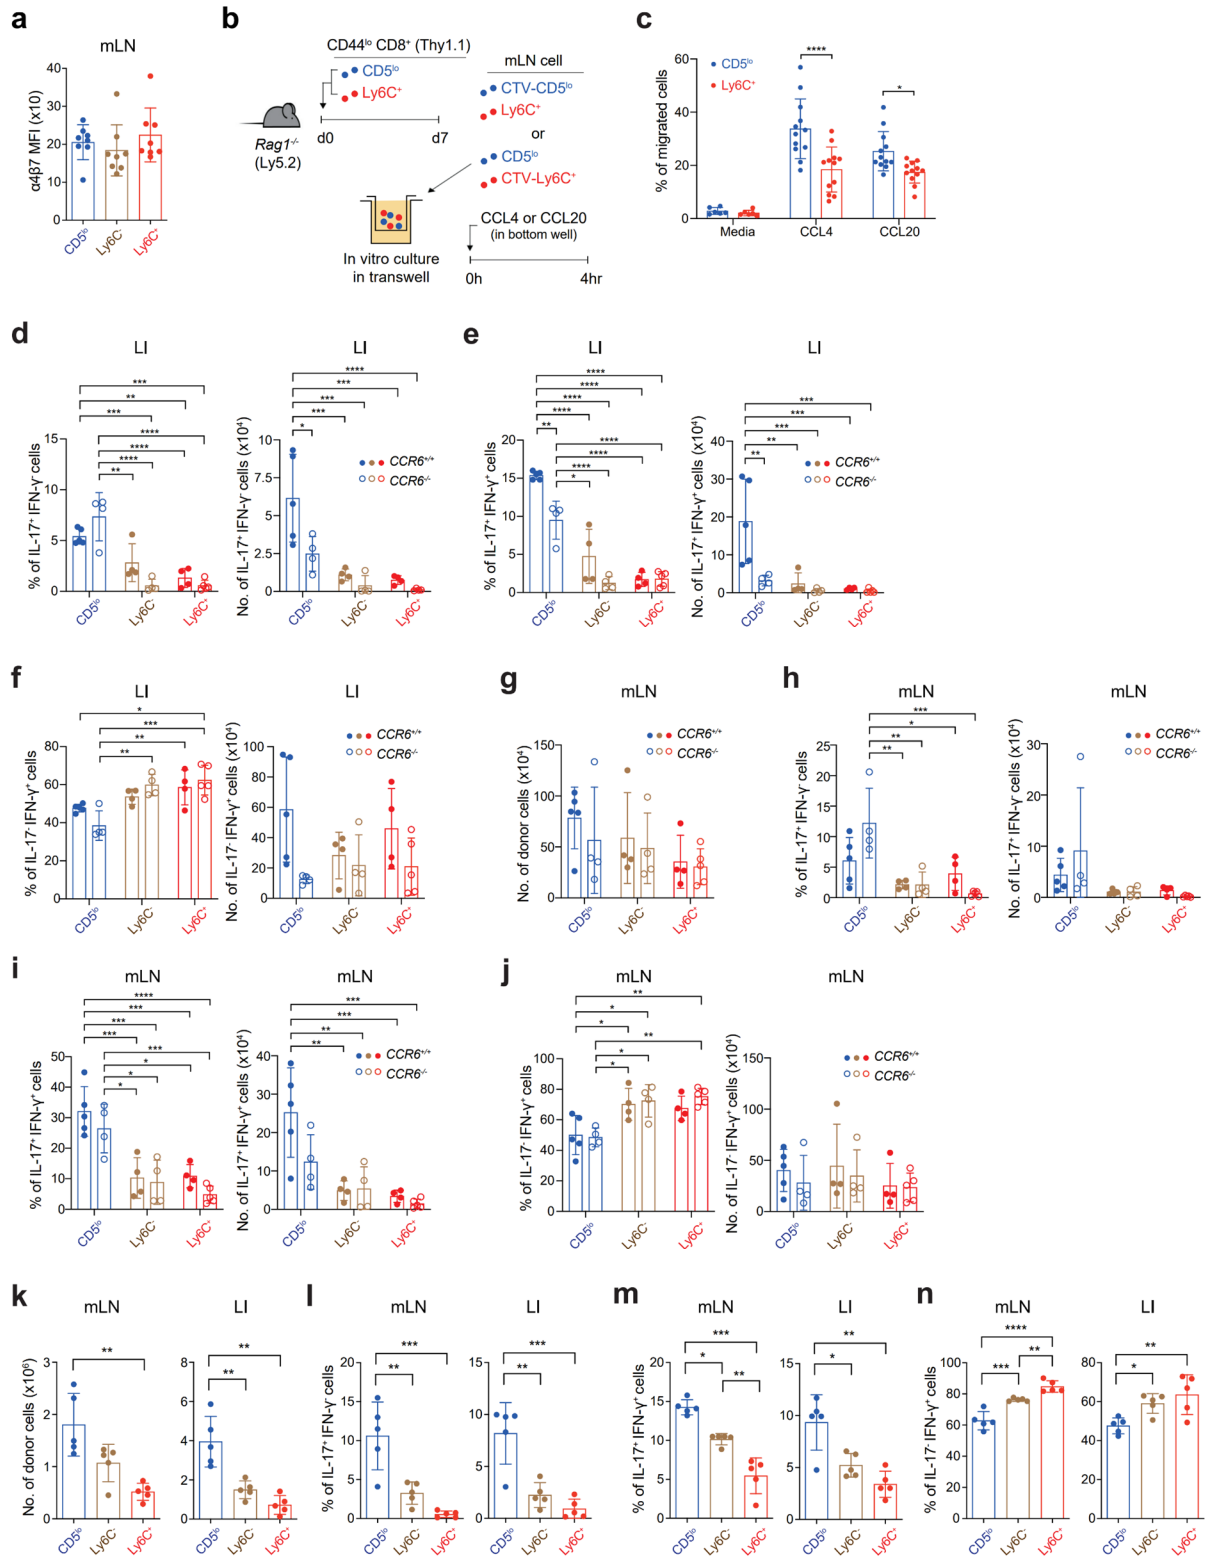

**Supplementary Fig. 3**

The impact of CCR6 deficiency on IL-17/IFN- $\gamma$  production of adoptively transferred CD8<sup>+</sup> T<sub>N</sub> subsets in Rag1<sup>-/-</sup> mice.

**a**, Expression levels (as the mean fluorescence intensity, MFI) of  $\alpha 4\beta 7$  of transferred donor subsets from day 7 mLN (n=8). **b**, Experimental design for **c**. **c**, Chemotactic migration was analyzed for transferred CD5<sup>lo</sup> and Ly6C<sup>+</sup> cells collected from day 7 mLN of *Rag1*<sup>-/-</sup> recipients (Media; n=6, CCL4 and CCL20; n=12). Data were pooled from two independent experiments (**c**, n=3–6 mice/experiment). **d–j**, Percentage and number of IL-17A<sup>+</sup>IFN- $\gamma$ <sup>-</sup> (**d,h**), IL-17A<sup>+</sup>IFN- $\gamma$ <sup>+</sup> (**e,i**), and IL-17A<sup>-</sup>IFN- $\gamma$ <sup>+</sup> (**f,j**) cells, were analyzed at day 14 after adoptive transfer with either *Ccr6*<sup>+/+</sup> or *Ccr6*<sup>-/-</sup> CD8<sup>+</sup> T<sub>N</sub> subsets. **k–n**, Number of donor cells (**k**) and the percentage of IL-17A<sup>+</sup>IFN- $\gamma$ <sup>-</sup> (**l**), IL-17A<sup>+</sup>IFN- $\gamma$ <sup>+</sup> (**m**), and IL-17A<sup>-</sup>IFN- $\gamma$ <sup>+</sup> (**n**) cells analyzed in mLN and LI at day 21 after transfer with *Ccr6*<sup>-/-</sup> CD8<sup>+</sup> T<sub>N</sub> subsets (**d–j**, n=4–5; **k–n**, n=5). Data are representative of two independent experiments and presented as the mean  $\pm$  SD (**a–l**). Statistical significance by two-way ANOVA Multiple comparisons. \*,  $P < 0.05$ ; \*\*,  $P < 0.01$ ; \*\*\*,  $P < 0.001$ ; \*\*\*\*,  $P < 0.0001$ . Source data and exact  $P$  value are provided as a Source Data file.

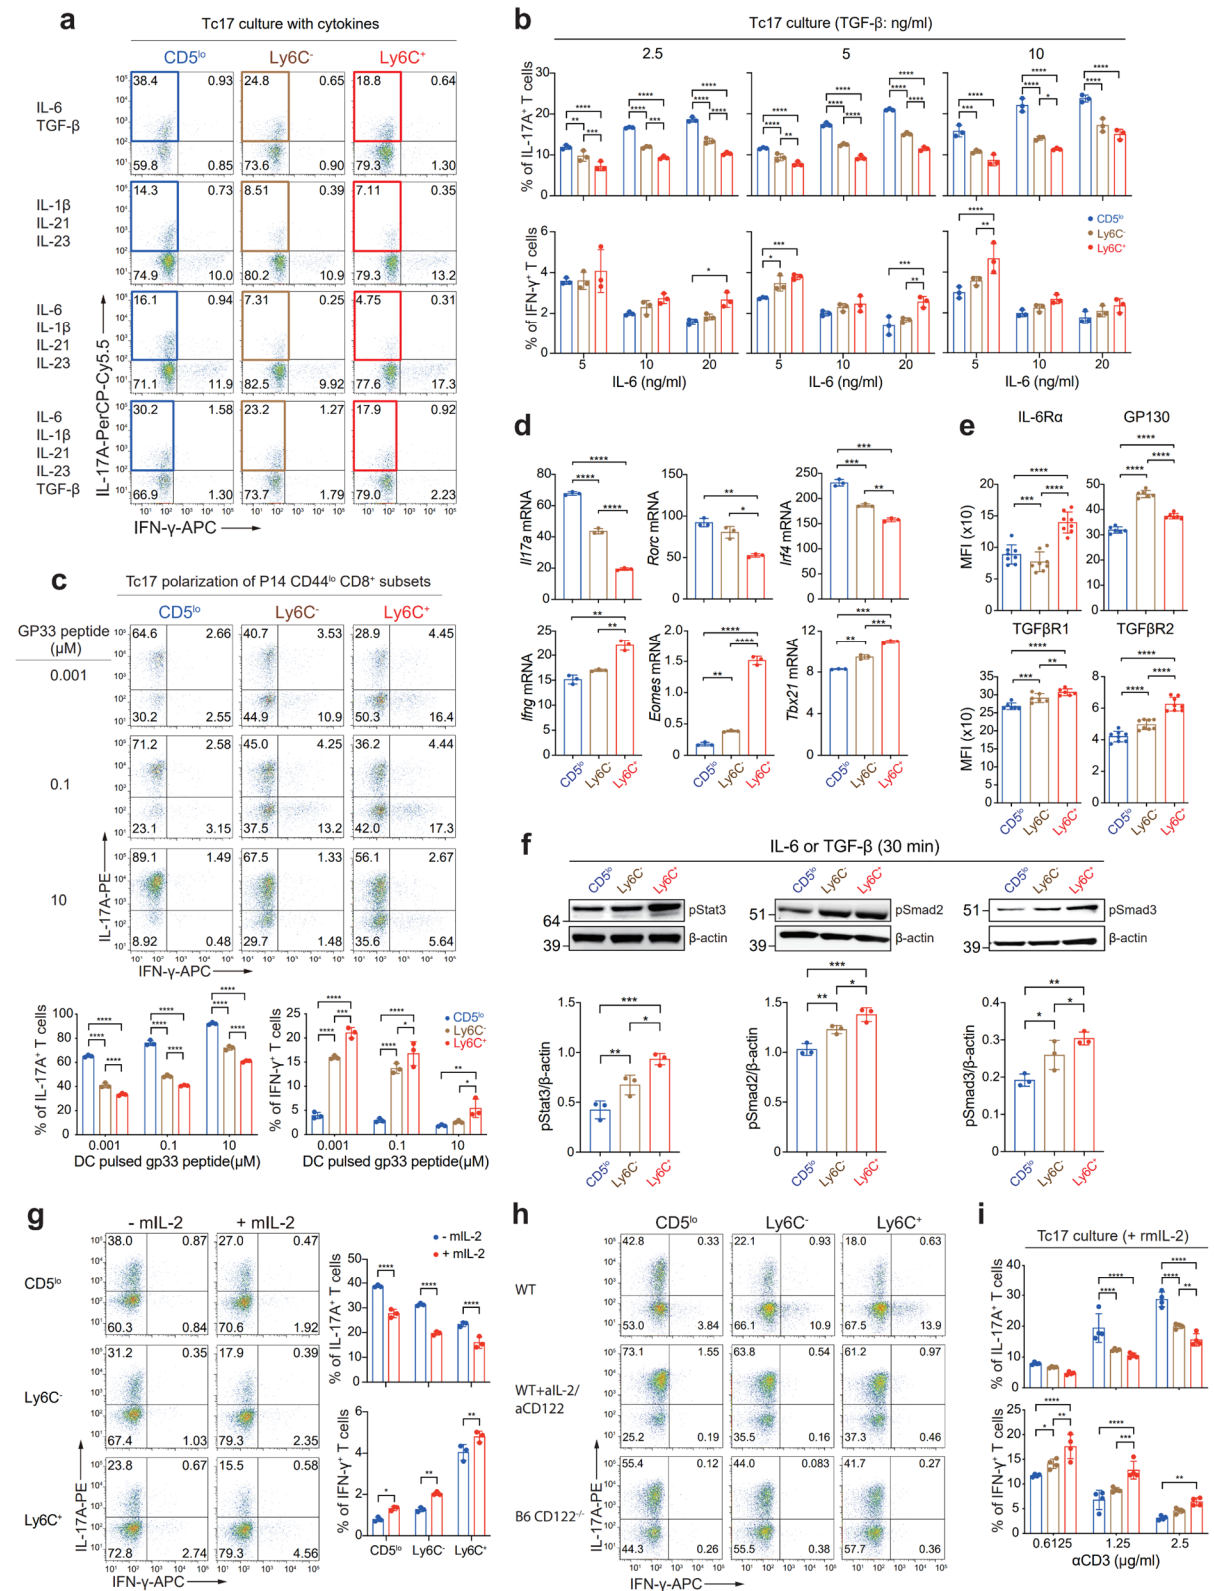

**Supplementary Fig. 4**

**Differential Tc17-skewing potential of CD8<sup>+</sup> T<sub>N</sub> subsets under various Tc17-polarizing conditions *in vitro*.**

**a**, Representative FACS plots for IL-17A/IFN- $\gamma$  production after *in vitro* culture with B6 CD8<sup>+</sup> T<sub>N</sub> subsets under various Tc17-polarizing conditions. **b**, Percentage of IL-17A<sup>+</sup> and IFN- $\gamma$ <sup>+</sup> cells after Tc17-polarizing culture with B6 CD8<sup>+</sup> T<sub>N</sub> subsets in the presence of various concentrations of IL-6 and TGF- $\beta$  (n=3 per experiment). **c**, Representative FACS plots for IL-17A/IFN- $\gamma$  production from P14 CD8<sup>+</sup> T<sub>N</sub> subsets stimulated with GP33 peptide-pulsed dendritic cells under Tc17-polarizing condition. **d**, qRT-PCR data for *Il17a*, *Rorc*, *Irf4*, *Ifng*, *Eomes*, and *Tbx21* after Tc17-polarizing culture with B6 CD8<sup>+</sup> T<sub>N</sub> subsets (n=3 per experiment). **e**, Expression levels of IL-6R $\alpha$ , GP130, TGF $\beta$ RI, and TGF $\beta$ RII on B6 CD8<sup>+</sup> T<sub>N</sub> subsets (n=6–8 mice/group). **f**, Levels of p-STAT3, p-SMAD2, and p-SMAD3 (shown in representative blot images, top, and intensity relative to  $\beta$ -actin, bottom) (n=3 per experiment). **g**, Representative FACS plots for IL-17A/IFN- $\gamma$  production (left) and the percentage of IL-17A<sup>+</sup> and IFN- $\gamma$ <sup>+</sup> cells (right) after Tc17-polarizing culture with B6 CD8<sup>+</sup> T<sub>N</sub> subsets in the presence or absence of rmIL-2 (n=3 per experiment). **h**, Representative FACS plots for IL-17A/IFN- $\gamma$  production after Tc17-polarizing culture with B6 CD8<sup>+</sup> T<sub>N</sub> subsets in the presence (middle) or absence of anti-IL-2/CD122 (top) or with *Cd122*<sup>-/-</sup> CD8<sup>+</sup> T<sub>N</sub> subsets (bottom). **i**, Percentage of IL-17A<sup>+</sup> and IFN- $\gamma$ <sup>+</sup> cells after Tc17-polarizing culture of B6 CD8<sup>+</sup> T<sub>N</sub> subsets with various concentrations of anti-CD3 and rmIL-2 (n=3 per experiment). Data is representative of two (**a–d,e**) to three independent experiments (**f,g,i**) and presented as the mean  $\pm$  SD (**b–g,i**). Statistical significance by two-way ANOVA Multiple comparisons. \*,  $P < 0.05$ ; \*\*,  $P < 0.01$ ; \*\*\*,  $P < 0.001$ ; \*\*\*\*,  $P < 0.0001$ . Source data and exact  $P$  value are provided as a Source Data file.

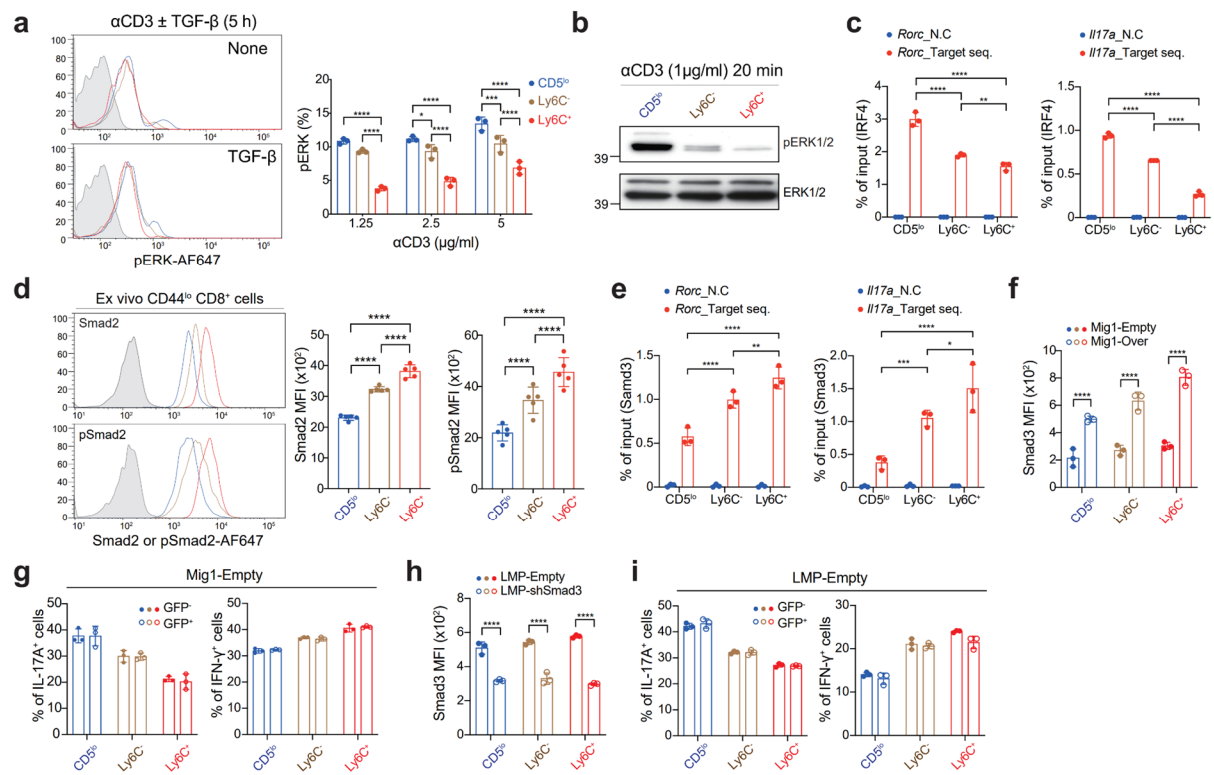

**Supplementary Fig. 5**

### Differential levels of TCR-induced ERK activation and endogenous SMAD2 expression in CD8<sup>+</sup> T<sub>N</sub> subsets.

**a**, Histograms (left) and percentages (right) for p-ERK expression among CD8<sup>+</sup> T<sub>N</sub> subsets stimulated with either anti-CD3 in the presence or absence of TGF- $\beta$  (left) or with various concentrations of anti-CD3 (right) (n=3 per experiment). **b**, Representative blot images of p-ERK after 20 min stimulation with anti-CD3. **c**, B6 CD8<sup>+</sup> T<sub>N</sub> subsets were activated under Tc17-polarizing conditions for 72 h and subjected to ChIP using IRF4 antibody. Eluted DNA was analyzed by qPCR (n=3 per experiment). **d**, Endogenous levels of SMAD2 and p-SMAD2 in *ex vivo* B6 CD8<sup>+</sup> T<sub>N</sub> subsets shown in histogram (left) and MFI (right) (n=5 mice/group). **e**, B6 CD8<sup>+</sup> T<sub>N</sub> subsets were activated under Tc17-polarizing conditions for 72 h and subjected to ChIP using SMAD3 antibody. Eluted DNA was analyzed by qPCR (n=3 per experiment). **f**, Expression levels of SMAD3 from Tc17-polarized CD8<sup>+</sup> T<sub>N</sub> subsets transduced with either MigR-1 control (empty) or MigR-1 encoding *SMAD3* (over) (n=3 per experiment). **g**,

Percentage of IL-17A<sup>+</sup> and IFN- $\gamma$ <sup>+</sup> cells in GFP<sup>-</sup> and GFP<sup>+</sup> cells transduced with MigR-1 empty vector control (n=3 per experiment). **h**, Expression levels of SMAD3 for Tc17-polarized CD8<sup>+</sup> T<sub>N</sub> subsets transduced with LMP empty vector control or LMP vector containing *SMAD3* shRNA. **I** (n=3 per experiment), Percentage of IL-17A<sup>+</sup> and IFN- $\gamma$ <sup>+</sup> cells in GFP<sup>-</sup> or GFP<sup>+</sup> cells transduced with LMP empty vector control. Data are representative of two (**b**) to three independent experiments (**a**, **c-i**) and presented as the mean  $\pm$  SD (**a,c-i**). Statistical significance by two-way ANOVA Multiple comparisons. \*,  $P < 0.05$ ; \*\*,  $P < 0.01$ ; \*\*\*,  $P < 0.001$ ; \*\*\*\*,  $P < 0.0001$ . Source data and exact  $P$  value are provided as a Source Data file.



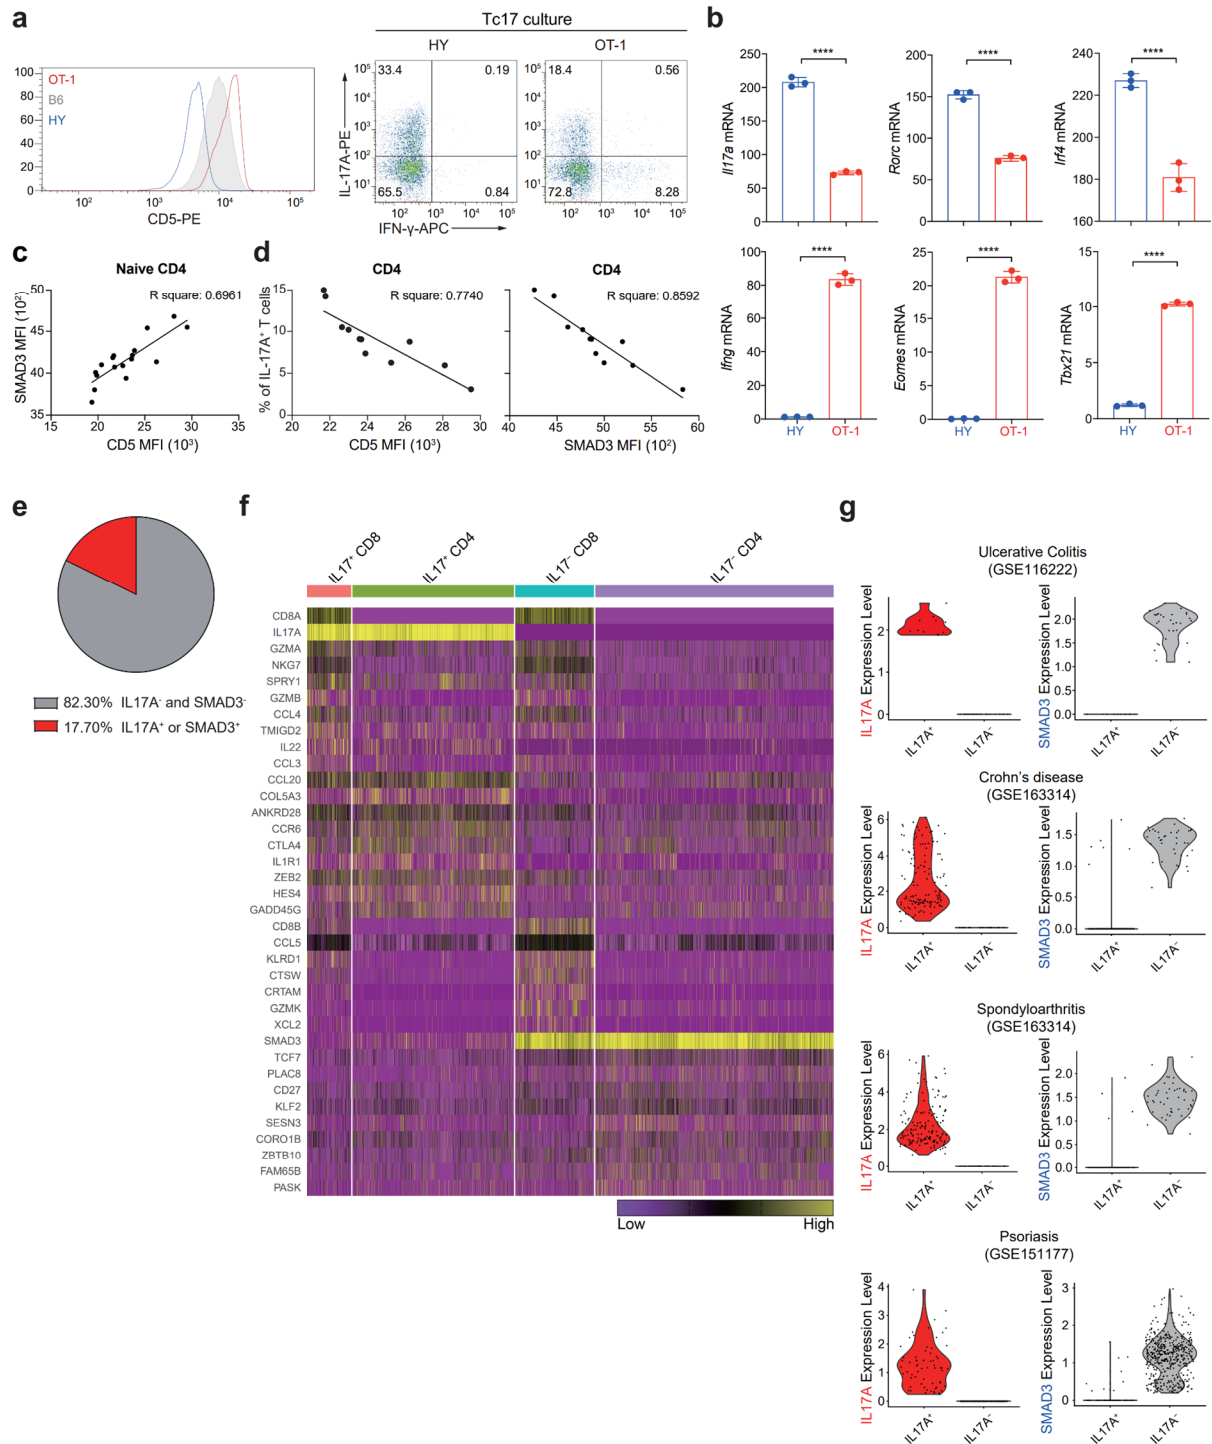

**Supplementary Fig. 6**

**Inverse relationship between CD5 and SMAD3 expression and Tc17 differentiation potential in mice and humans.**

**a**, Expression levels of CD5 shown in histogram for HY and OT-1 *ex vivo* (left), and representative FACS plots for IL-17A/IFN- $\gamma$  production (right) after Tc17-polarizing culture.

**b**, qRT-PCR data for *Il17a*, *Rorc*, *Irf4*, *Ifng*, *Eomes*, and *Tbx21* analyzed for Tc17-polarized HY and OT-1 CD8<sup>+</sup> T<sub>N</sub> cells (n=3 per experiment). **c**, Relationship between CD5 and SMAD3 levels *ex vivo* in CD4<sup>+</sup> T<sub>N</sub> populations from healthy human bloods (n=17). **d**, Relationship between CD5 (left) or SMAD3 (right) levels *ex vivo* and the percentages of IL-17A<sup>+</sup> cells after Tc17-polarizing cultures with human CD4<sup>+</sup> T<sub>N</sub> populations (n=11). **e,f**, *IL17A* and *SMAD3* expression profiles in CD3<sup>+</sup> cells (**e**) and heatmap of differentially expressed genes of *IL17<sup>+</sup>CD8<sup>+</sup>*, *IL17<sup>+</sup>CD4<sup>+</sup>*, *IL-17<sup>-</sup>CD8<sup>+</sup>*, and *IL17<sup>-</sup>CD4<sup>+</sup>* T cells (**f**) in public scRNA-seq dataset performed with inflamed tissues from UC patients (GSE162335). **g**, *IL17A* and *SMAD3* expression of CD3<sup>+</sup> cells that are either *IL17A<sup>+</sup>* or *SMAD3<sup>+</sup>* in public scRNA-seq datasets performed with tissues from patients with Ulcerative Colitis (GSE116222), Crohn's disease (GSE163314), Spondyloarthritis (GSE163314), and Psoriasis (GSE151177), respectively. Data are representative of (**a,b**) or pooled (**c,d**) from two independent experiments and presented as the mean ± SEM (**b–d**). Statistical significance by simple linear regression two-way ANOVA Multiple comparisons. \*, *P* < 0.05; \*\*, *P* < 0.01; \*\*\*, *P* < 0.001; \*\*\*\*, *P* < 0.0001. Source data and exact *P* value are provided as a Source Data file.

**a**

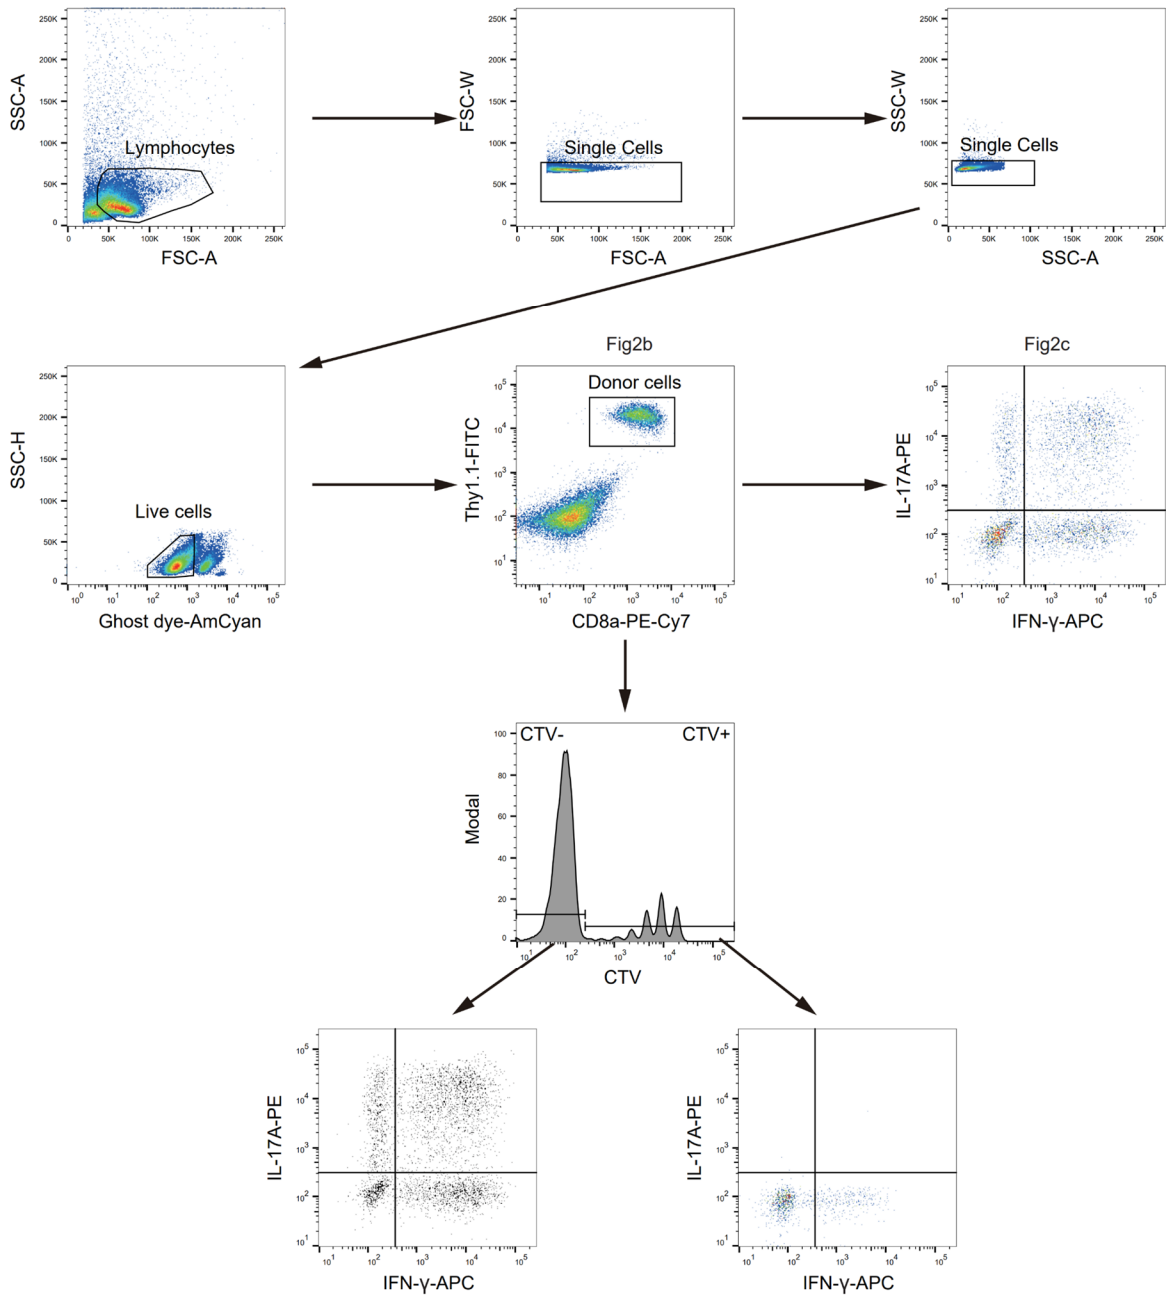

Cont.

**b**

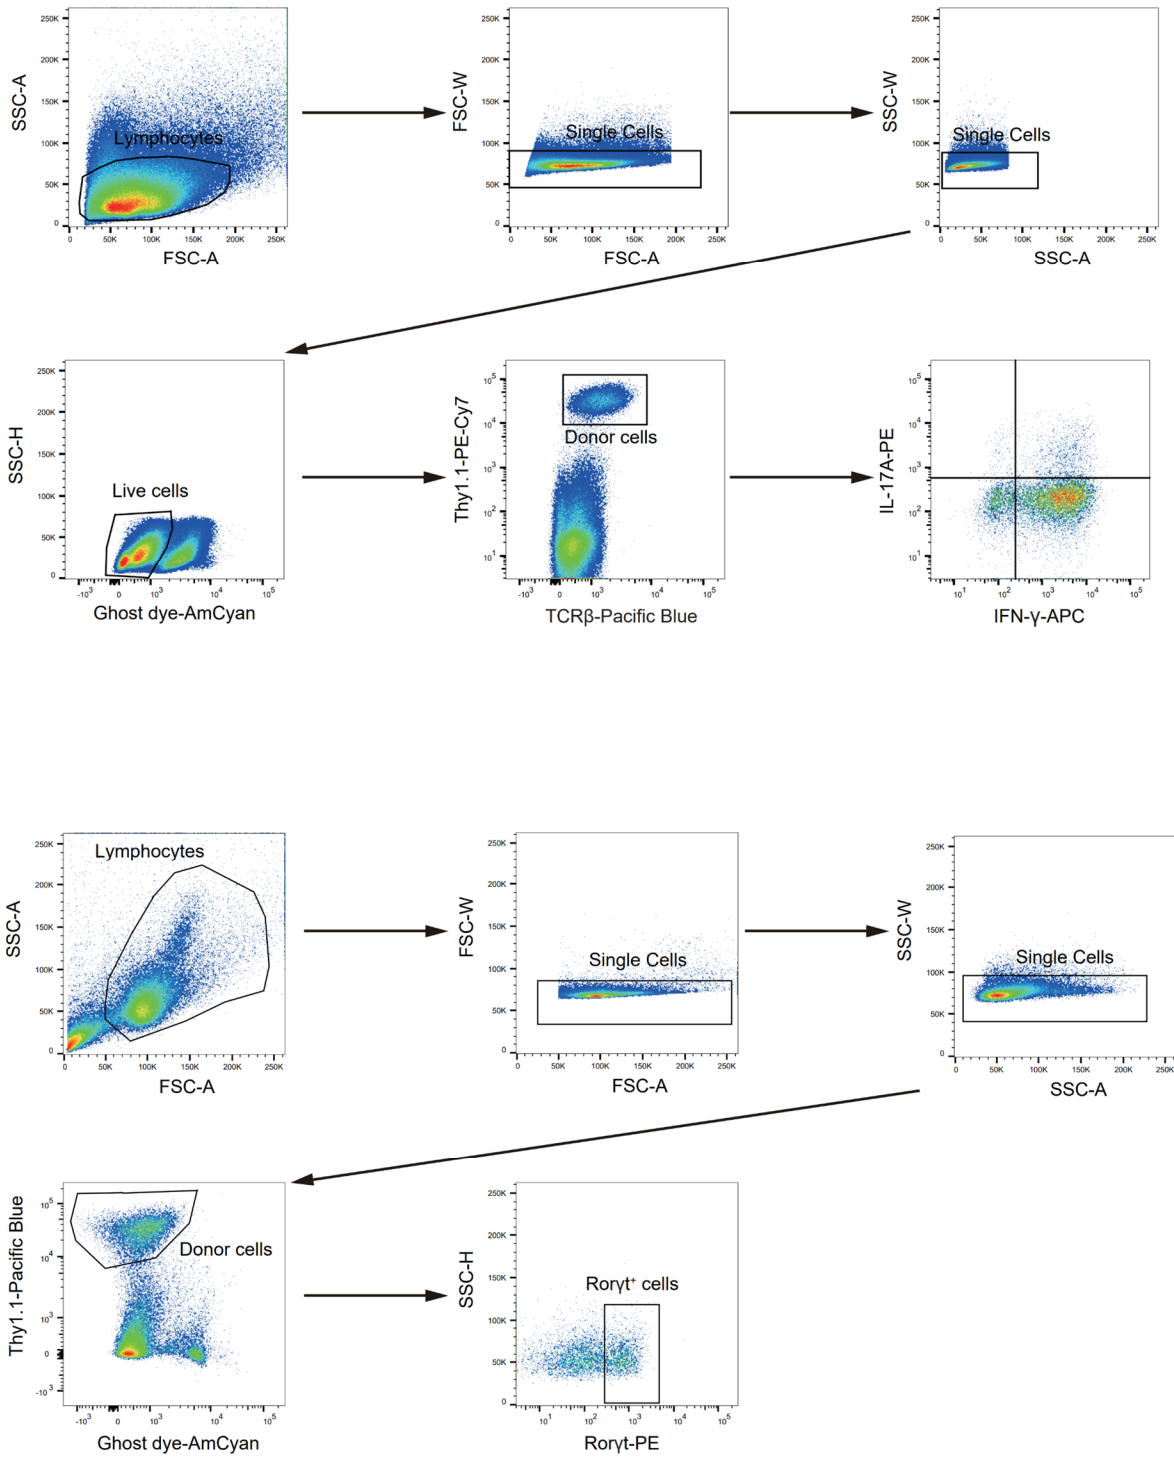

Cont.

**c**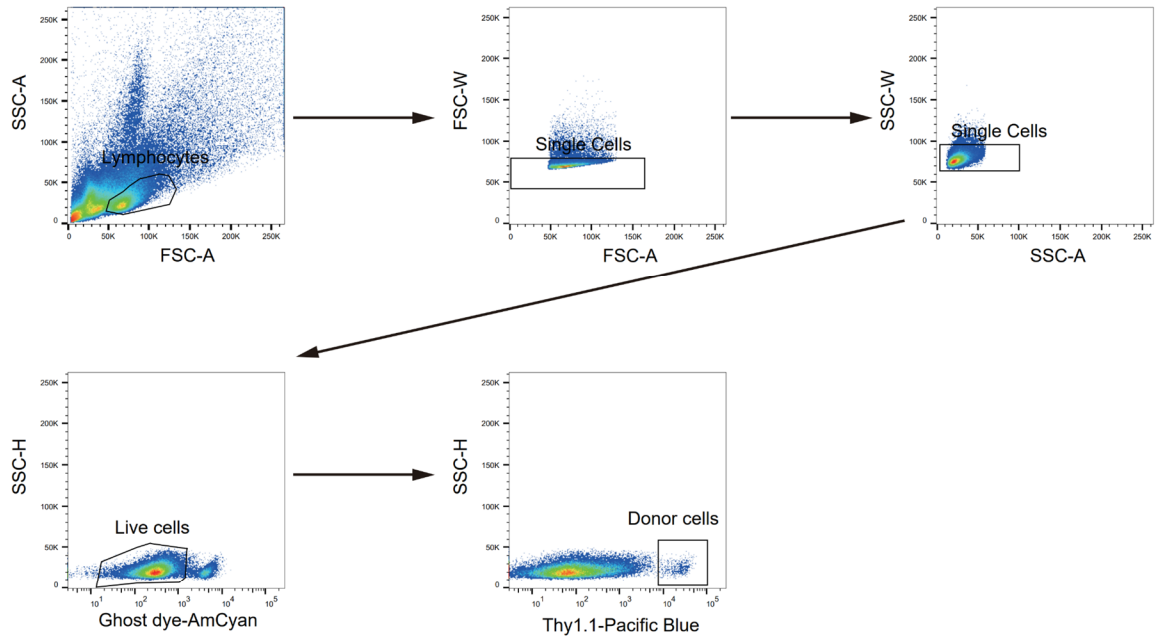**d**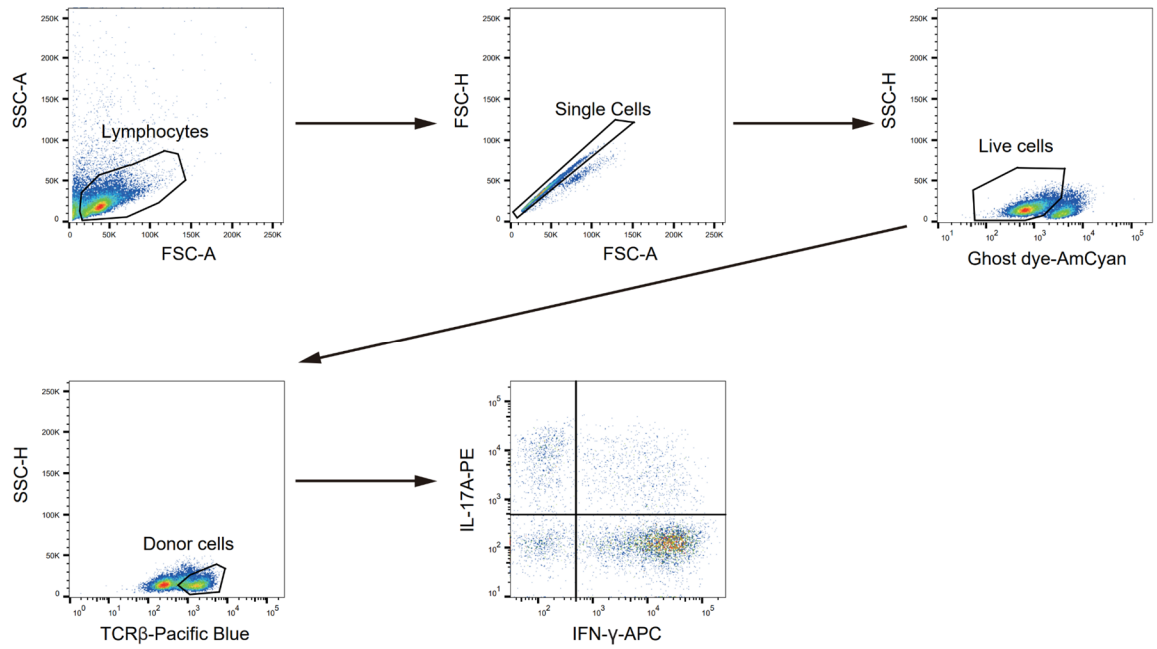

Cont.

**e**

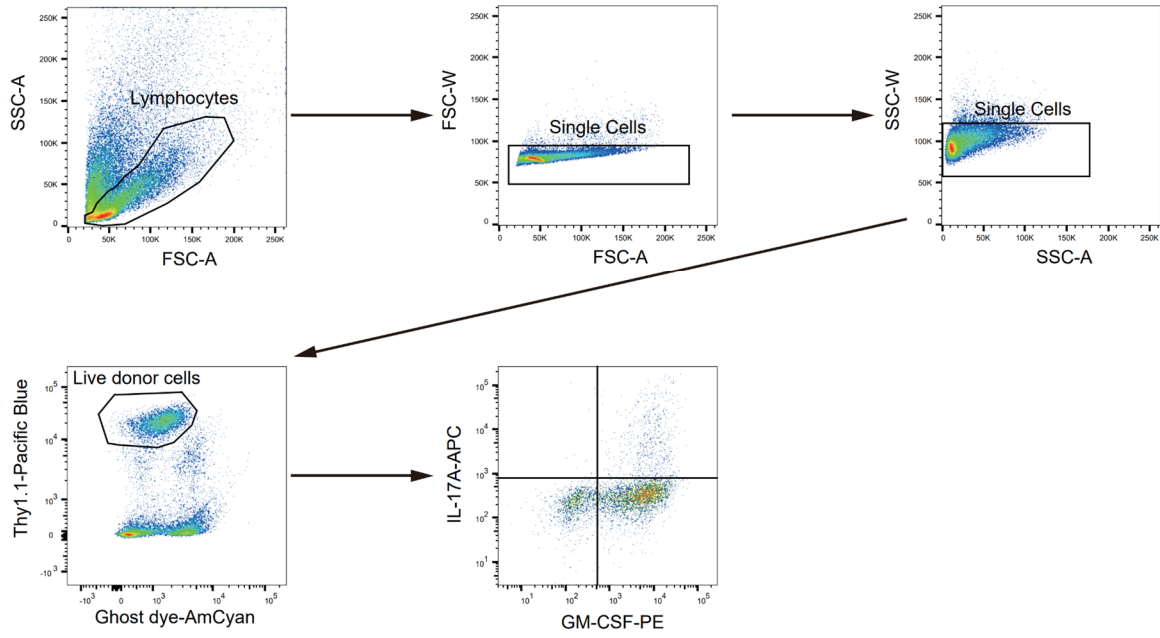

**f**

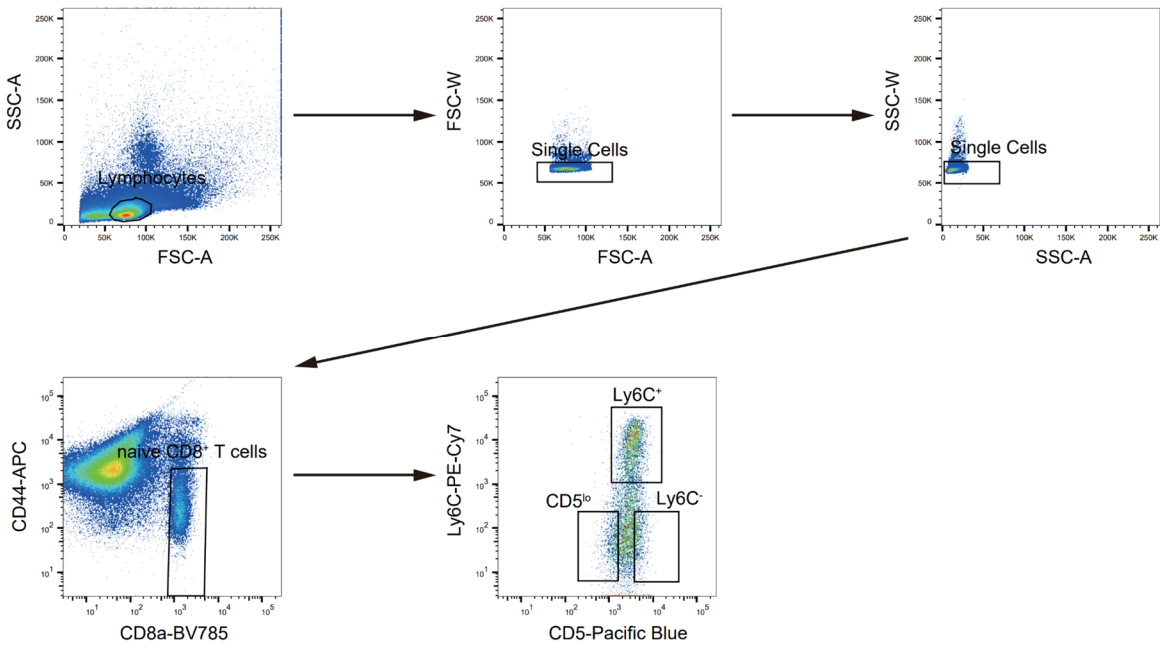

Cont.

**g**

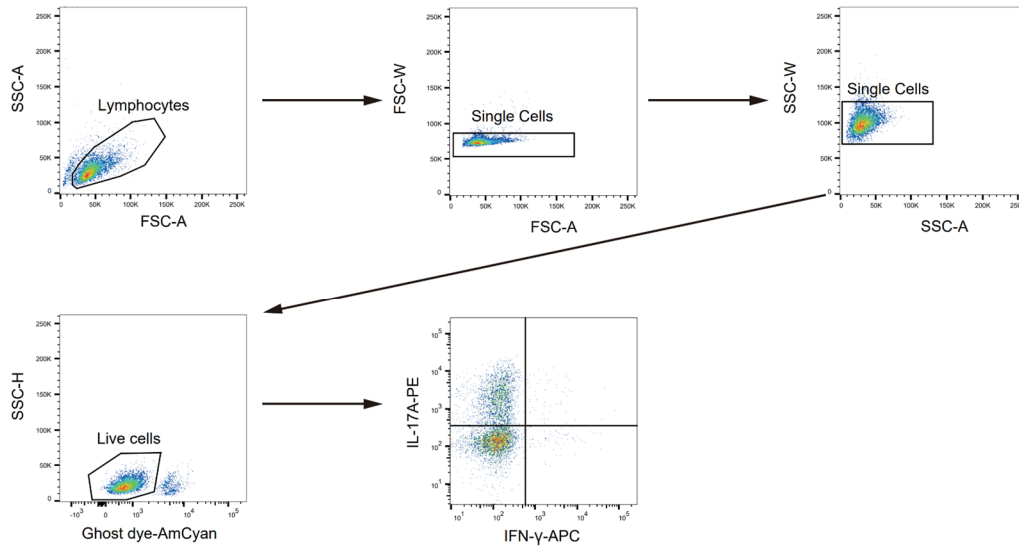

**h**

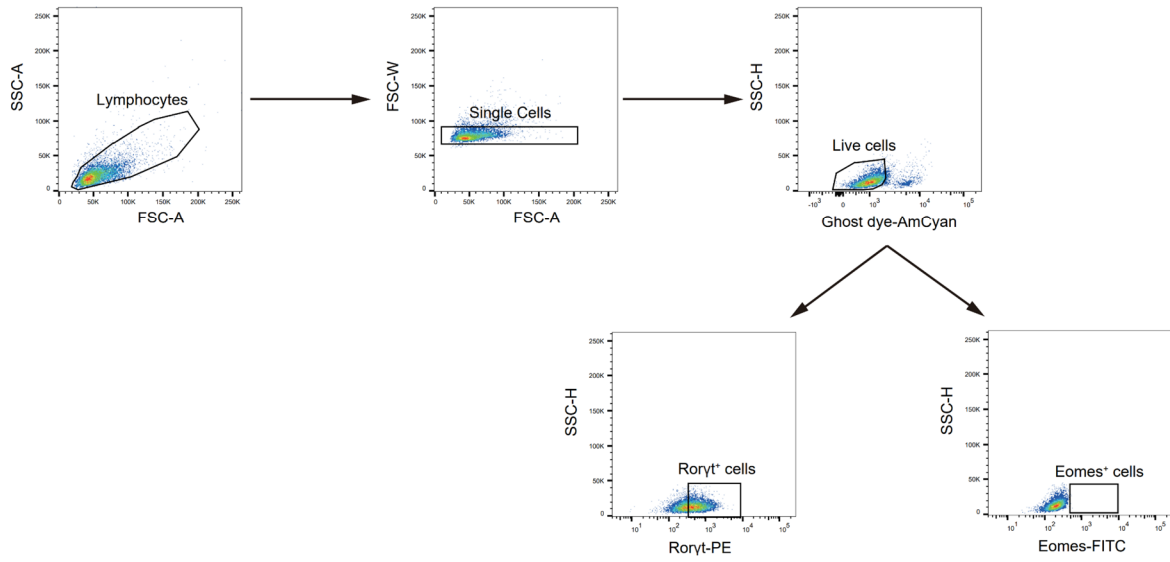

Cont.



i

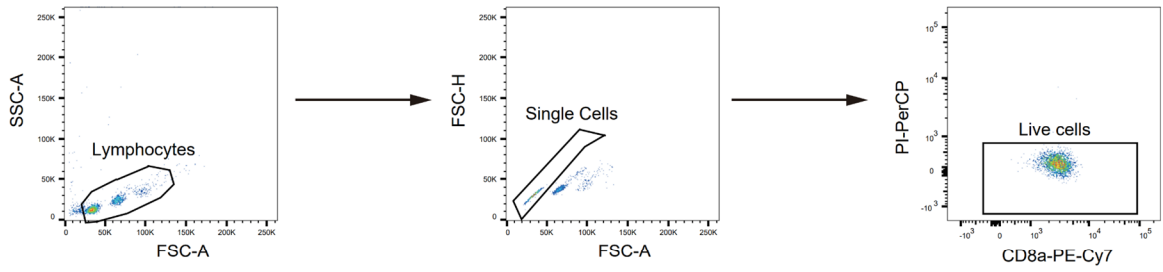

j

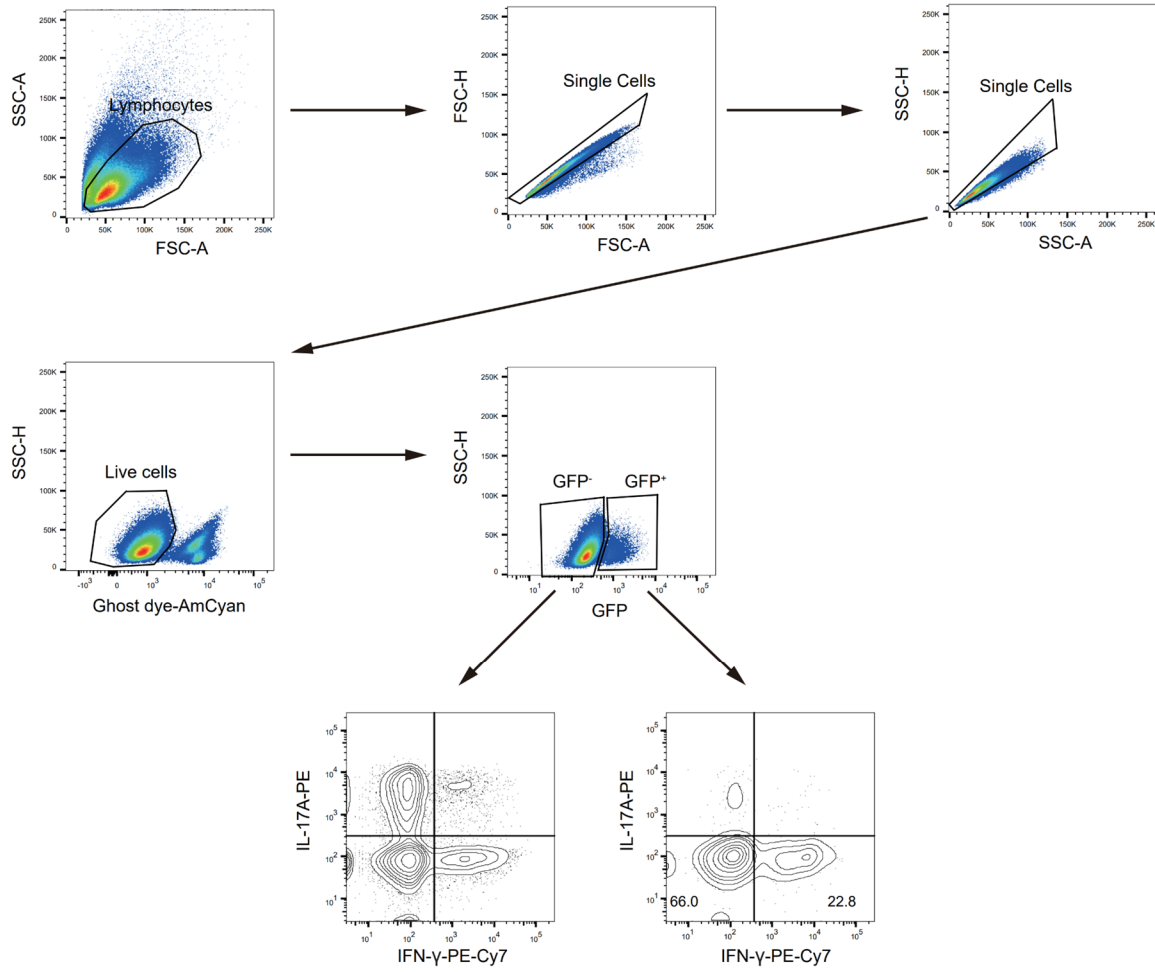

Cont.

k

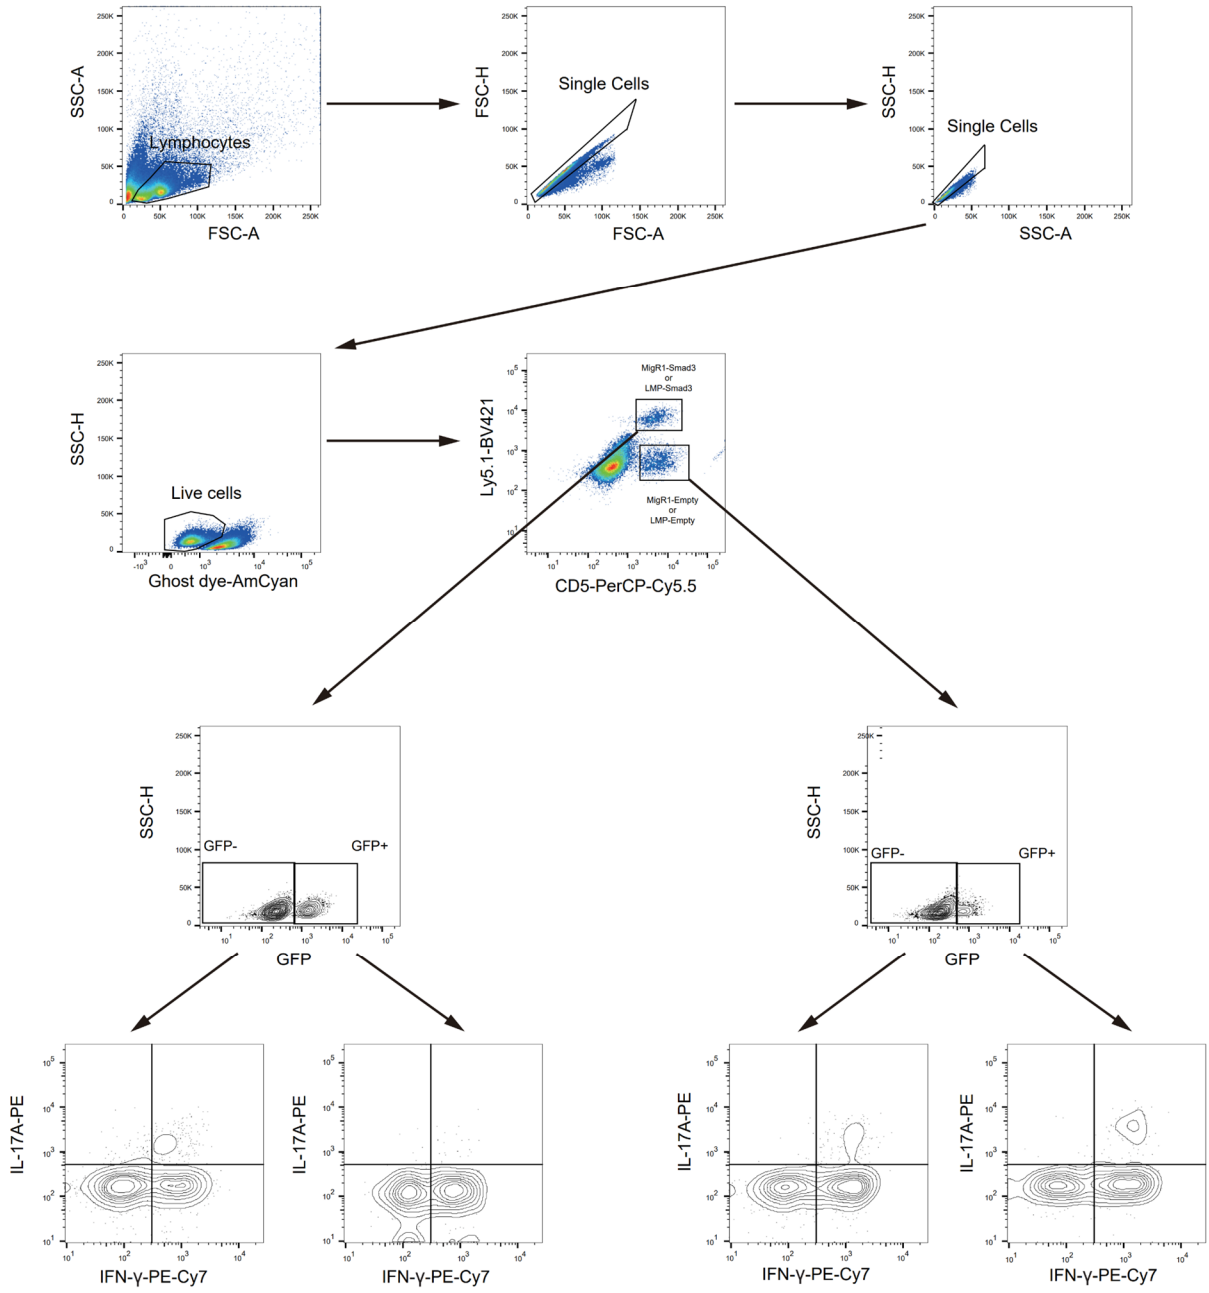

Cont.

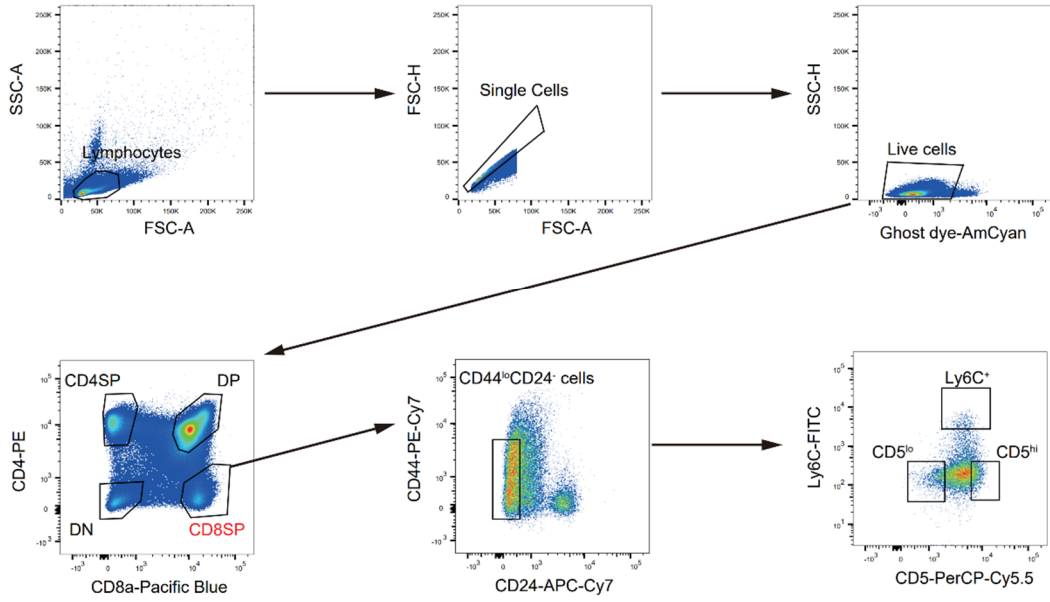

m

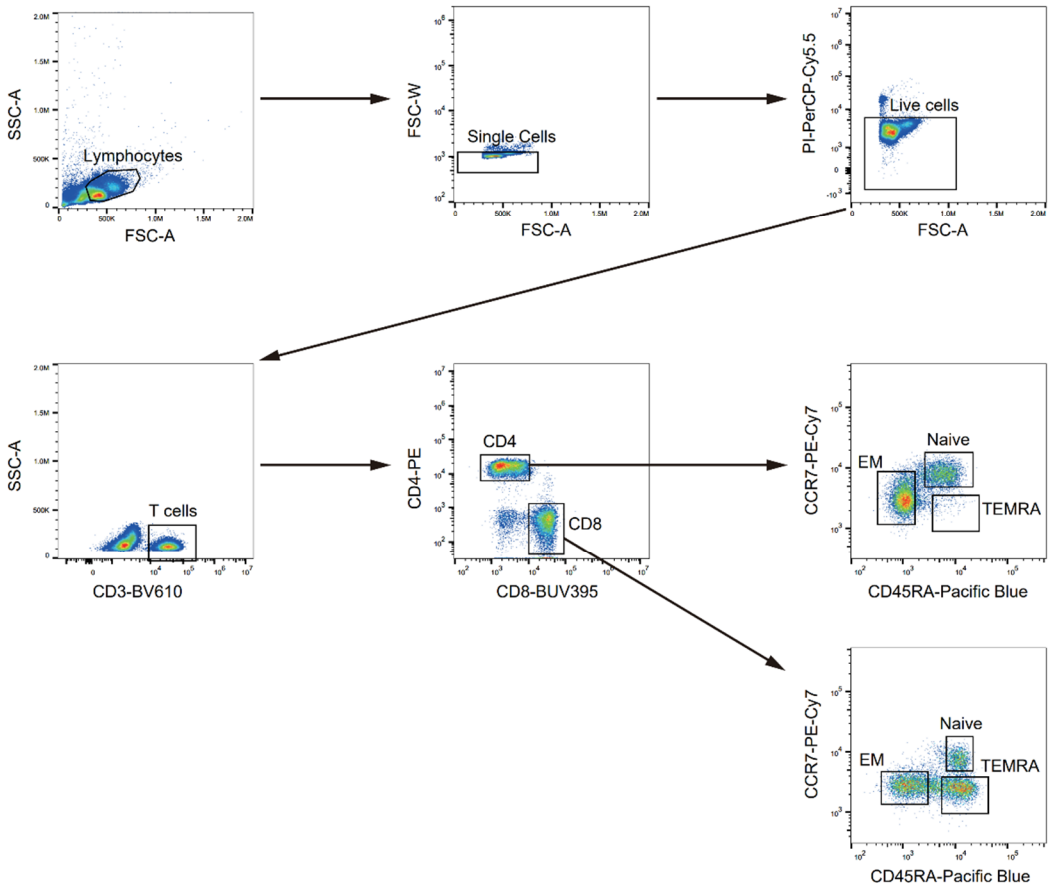

Cont.

n

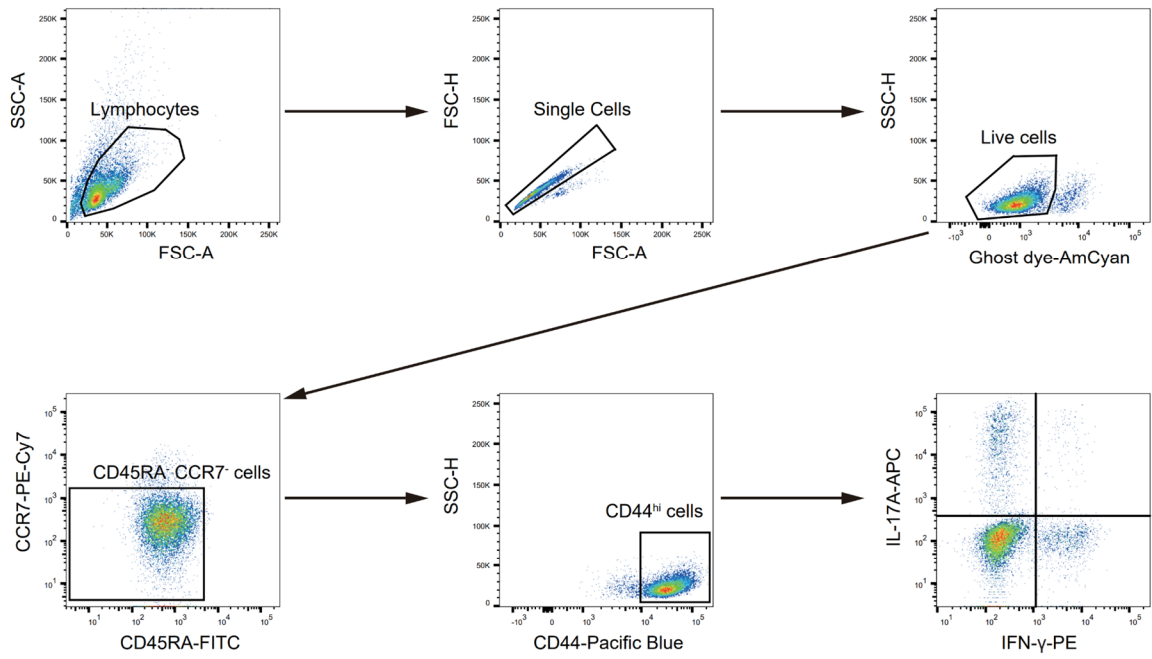

o

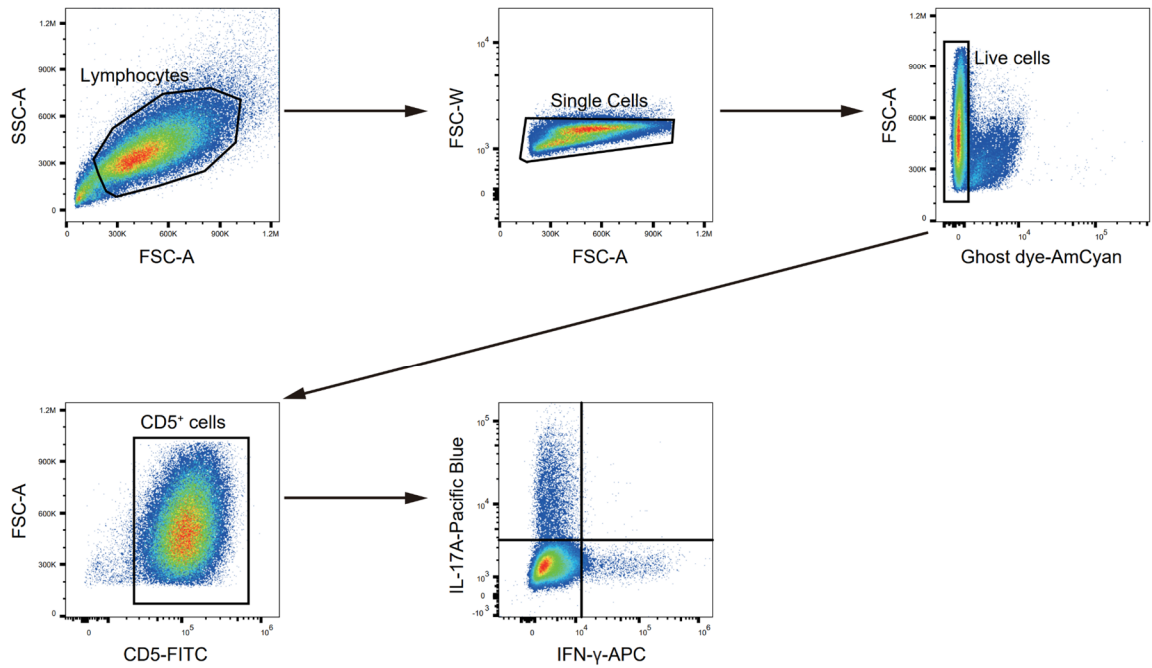

Supplementary Fig. 7

Gating strategies for flow cytometry data.

**a**, Gating strategy for Fig. 2b,c, and Supplementary Fig. 2a,b. **b**, Gating strategy for Fig. 2e,g,h,i, and Supplementary Fig. 2d–f,g. **c**, Gating strategy for Fig. 3a, and Supplementary Fig. 3a. **d**, Gating strategy for Fig. 3e,g,h, and Supplementary Fig. 3b–l. **e**, Gating strategy for Fig. 4e–h. **f**, Gating strategy for Supplementary Fig4. e. **g**, Gating strategy for Fig. 5b,c,e,g,h,j, Fig. 7c,d, and Supplementary Fig. 4a–c,g–i. **h**, Gating strategy for Fig. 5d. **i**, Gating strategy for Fig. 6a,c, and Supplementary Fig. 5a,d. **j**, Gating strategy for Fig. 6e,f, and Supplementary Fig. 5f–i. **k**, Gating strategy for Fig6. g–j. **l**, Gating strategy for Fig. 7a. **m**, Gating strategy for Fig. 7h, and Supplementary Fig. 6c. **n**, Gating strategy for Fig. 7i, and Supplementary Fig. 6d. **o**, Gating strategy for Fig. 7j.

| Antibodies                                     | Manufacturer              | Catalog #    | Applications                    | Dilution |
|------------------------------------------------|---------------------------|--------------|---------------------------------|----------|
| anti-CD16/32                                   | ebioscience               | 14-0161-82   | Flow cytometry                  | 1:300    |
| anti-CD3 $\epsilon$ (PB); clone 145-2C11       | Biolegend                 | 100334       | Flow cytometry                  | 1:300    |
| anti-CD5 (PE); clone 53-7.3                    | Invitrogen                | 12-0051-83   | Flow cytometry                  | 1:300    |
| anti-CD44 (eF450); clone IM7                   | Invitrogen                | 48-0441-82   | Flow cytometry                  | 1:300    |
| anti-CD62L (PE); clone MEL-14                  | Biolegend                 | 104408       | Flow cytometry                  | 1:300    |
| anti-CD45.1 (BUV395); clone A20                | BD Bioscience             | 565212       | Flow cytometry                  | 1:300    |
| anti-CD45.2 (PB); clone 104                    | Biolegend                 | 109820       | Flow cytometry                  | 1:300    |
| anti-CD90.1 (FITC); clone HIS51                | Invitrogen                | 11-0900-85   | Flow cytometry                  | 1:300    |
| anti-CD90.2 (PE) (53-2.1)                      | ebioscience               | 15298609     | Flow cytometry                  | 1:300    |
| anti-Ly6C (PE-cy7) (HK1.4)                     | ebioscience               | 15518606     | Flow cytometry                  | 1:300    |
| anti-CD8 $\alpha$ (APC) (53-6.7)               | Tonbo                     | 20-0081-U100 | Flow cytometry                  | 1:300    |
| anti-CD126 (APC) (D7715A7)                     | Biolegend                 | 115812       | Flow cytometry                  | 1:300    |
| anti-GP130 (APC); clone KGP130                 | ThermoFisher              | 17-1302-82   | Flow cytometry                  | 1:300    |
| anti-TGFBRI (APC); clone 141231                | R&D biosystems            | FAB5871A     | Flow cytometry                  | 1:300    |
| anti-TGFBRII (PE); polyclonal                  | R&D biosystems            | FAB532P      | Flow cytometry                  | 1:300    |
| anti- $\alpha$ 4 $\beta$ 7 (APC); clone DATK32 | ThermoFisher              | 17-5887-82   | Flow cytometry                  | 1:300    |
| anti-CD195 (PE); clone HM-CCR5                 | ebioscience               | 12-1951-81   | Flow cytometry                  | 1:300    |
| anti-CD196 (PE); clone 29-2L17                 | Biolegend                 | 129804       | Flow cytometry                  | 1:300    |
| anti-IFN- $\gamma$ (APC); clone XMG1.2         | Invitrogen                | 17-7311-82   | Flow cytometry                  | 1:200    |
| anti-IL-17A (PE-Cy7); clone TC11-18H10.1       | Biolegend                 | 506922       | Flow cytometry                  | 1:200    |
| anti-IL-17A (PE); clone eBio17B7               | Invitrogen                | 12-7177-81   | Flow cytometry                  | 1:200    |
| anti-Eomes (APC)                               | ebioscience               | 50-4875-82   | Flow cytometry                  | 1:200    |
| anti-Ror $\gamma$ t (PE); clone B2D            | Invitrogen                | 12-6981-82   | Flow cytometry                  | 1:200    |
| anti-Ror $\gamma$ t (PE-eF610); clone B2D      | Invitrogen                | 61-6981-82   | Flow cytometry                  | 1:200    |
| anti-IRF4 (APC); clone IRF4.3E4                | Biolegend                 | 646408       | Flow cytometry                  | 1:200    |
| anti-GM-CSF (PE); clone MP1-22E9               | Invitrogen                | 12-7331-82   | Flow cytometry                  | 1:200    |
| anti-pERK (PE); clone py204                    | BD Bioscience             | 612566       | Flow cytometry                  | 1:200    |
| anti-hCD3 (APC-cy7); clone HIT3a               | Biolegend                 | 300318       | Flow cytometry                  | 1:100    |
| anti-hCD4 (APC); clone A161A1                  | Biolegend                 | 357408       | Flow cytometry                  | 1:100    |
| anti-hCD5 (PE); clone L17F12                   | Biolegend                 | 364014       | Flow cytometry                  | 1:100    |
| anti-hCD8 (FITC); clone SK1                    | Biolegend                 | 344704       | Flow cytometry                  | 1:100    |
| anti-hCD45RA (PB); clone HI100                 | Biolegend                 | 304123       | Flow cytometry                  | 1:100    |
| anti-hCCR7 (PE-cy7); clone G043H7              | Biolegend                 | 353225       | Flow cytometry                  | 1:100    |
| anti-hIFN- $\gamma$ (APC); clone B27           | Biolegend                 | 506510       | Flow cytometry                  | 1:100    |
| anti-hIL-17A (BV421); clone BL168              | Biolegend                 | 512322       | Flow cytometry                  | 1:100    |
| anti-hIL-17A (PE); clone BL168                 | Biolegend                 | 512306       | Flow cytometry                  | 1:100    |
| anti-pSMAD2; clone 138D4                       | Cell Signaling Technology | 3108         | Flow cytometry and Western blot | 1:500    |
| anti-pSMAD3; clone C25A9                       | Cell Signaling Technology | 9520         | Flow cytometry and Western blot | 1:500    |
| anti-IRF4; clone D9P5H                         | Cell Signaling Technology | 15106        | Chip assay                      | 1:100    |
| anti-pSTAT3; clone D3A7                        | Cell Signaling Technology | 9145         | Western blot                    | 1:1000   |
| anti-Smad2; clone D43B4                        | Cell Signaling Technology | 5339         | Flow cytometry                  | 1:500    |
| anti-Smad3; clone C67H9                        | Cell Signaling Technology | 9523         | Flow cytometry                  | 1:500    |
| anti- $\beta$ -actin; clone AC-15              | Sigma-Aldrich             | A1978        | Western blot                    | 1:5000   |
| goat anti-rabbit IgG (AF647)                   | Invitrogen                | A21245       | Flow cytometry                  | 1:300    |
| m-IgG $\kappa$ BP-HRP                          | Santa Cruz Biotechnology  | sc-516102    | Western blot                    | 1:1000   |
| goat anti-rabbit IgG-HRP                       | Santa Cruz Biotechnology  | sc-2004      | Western blot                    | 1:1000   |
| anti-CD3 $\epsilon$ (Purified); clone 145-2C11 | ebioscience               | 16-0031-86   | In vitro cell culture           |          |
| anti-CD28 (Purified); clone 37.51              | ebioscience               | 16-0281-86   | In vitro cell culture           |          |
| anti-IFN- $\gamma$ (Purified); clone XMG1.2    | ebioscience               | 16-7311-85   | In vitro cell culture           |          |
| anti-IL-4 (Purified); clone 11B11              | ebioscience               | 16-7041-85   | In vitro cell culture           |          |
| anti-hIFN- $\gamma$ (Purified); clone B27      | Biolegend                 | 506501       | In vitro cell culture           |          |
| anti-hIL-4 (Purified); clone MP4-25D2          | Biolegend                 | 500802       | In vitro cell culture           |          |

**Supplementary Table. 1**

**Antibodies.**



| Primers                        | Manufacturer       | Catalog #     |
|--------------------------------|--------------------|---------------|
| TaqMan probe <i>Rorc</i>       | Applied Biosystems | Mm01261022_m1 |
| TaqMan probe <i>I17a</i>       | Applied Biosystems | Mm00439618_m1 |
| TaqMan probe <i>Irf4</i>       | Applied Biosystems | Mm00516431_m1 |
| TaqMan probe <i>Ifny</i>       | Applied Biosystems | Mm01168134_m1 |
| TaqMan probe <i>Tbx21</i>      | Applied Biosystems | Mm00450960_m1 |
| TaqMan probe <i>Eomes</i>      | Applied Biosystems | Mm01351984_m1 |
| TaqMan probe <i>Rn18sRn45s</i> | Applied Biosystems | Mm03928990_g1 |

| Rorc region (IRF4)      | Sense primer             | Antisense primer      |
|-------------------------|--------------------------|-----------------------|
| N.C. _-1576 ~ -1737     | TGAGCACACTATCACTCTCTTCAG | TGACCCTTGGGTAGGAGAGA  |
| Target_ +10747 ~ +10824 | GGGCCCTGAGATGGTAAGTT     | GGGTGCTGAGTAATCACAGGA |

| <i>I17a</i> region (IRF4) | Sense primer          | Antisense primer           |
|---------------------------|-----------------------|----------------------------|
| N.C. _-3387 ~ -3523       | CTCCCATGTGGTCATTATTGC | GTGTCCTTAGGTCCTAAATGTAGG   |
| Target_ -1592~-1815       | AATCCATGGAGCTGGAGAGA  | TTTTTATACAACATAGGTCTTCATGG |

| <i>Rorc</i> region (Smad3) | Sense primer         | Antisense primer     |
|----------------------------|----------------------|----------------------|
| N.C. _-727 ~ -881          | GGTTGTTGGGTAAGCAGGAA | CACGACCCCGTAATTCTGTT |
| Target_ -862 ~ -1181       | CAACGGTGGAGAATGGAATG | TCCTGCTTACCCAACAACC  |

| <i>I17a</i> region (Smad3) | Sense primer         | Antisense primer       |
|----------------------------|----------------------|------------------------|
| N.C. _-1211 ~ -984         | CAGGGATAATGCCAAGGGTA | AGCATGAGGTGGACCGATAG   |
| Target_ -11~ -185          | AACTTCTGCCCTTCCCATCT | GCTCCTTCTCTCTTTTATACGG |

#### Smad3 overexpression

|         |                               |
|---------|-------------------------------|
| Forward | GACTCGAGATGTCGTCCATCCTGCCC    |
| Reverse | GAGAATTCCTAAGACACACTTTAACAGCG |

|                          |                                                                                             |
|--------------------------|---------------------------------------------------------------------------------------------|
| shRNA sequence for Smad3 | TGCTGTTGACAGTGAGCGAACGCAGAACGTGAACACCAAGTAG<br>TGAAGCCACAGATGTACTTGGTGTTACGTTCTGCGTGTGCCTAC |
|--------------------------|---------------------------------------------------------------------------------------------|

## Supplementary Table. 2

### Primers.
